# Supplementary material for: Development of a Parenteral Formulation of NTS-Polyplex Nanoparticles for Clinical Purpose
Source: MDPI journal article supplement (doi:10.3390/pharmaceutics10010005), 2018-01-03
Supplement: s1 [file s1]

# Development of a Parenteral Formulation of NTS-Polyplex Nanoparticles for Clinical Purpose

María E. Aranda-Barradas <sup>1</sup>, Maripaz Márquez <sup>2,3</sup>, Liliana Quintanar <sup>2</sup>, Jaime Santoyo-Salazar <sup>4</sup>, Armando J. Espadas-Álvarez <sup>5</sup>, Daniel Martínez-Fong <sup>1,5,t</sup> and Elizabeth García-García <sup>6,\*</sup>

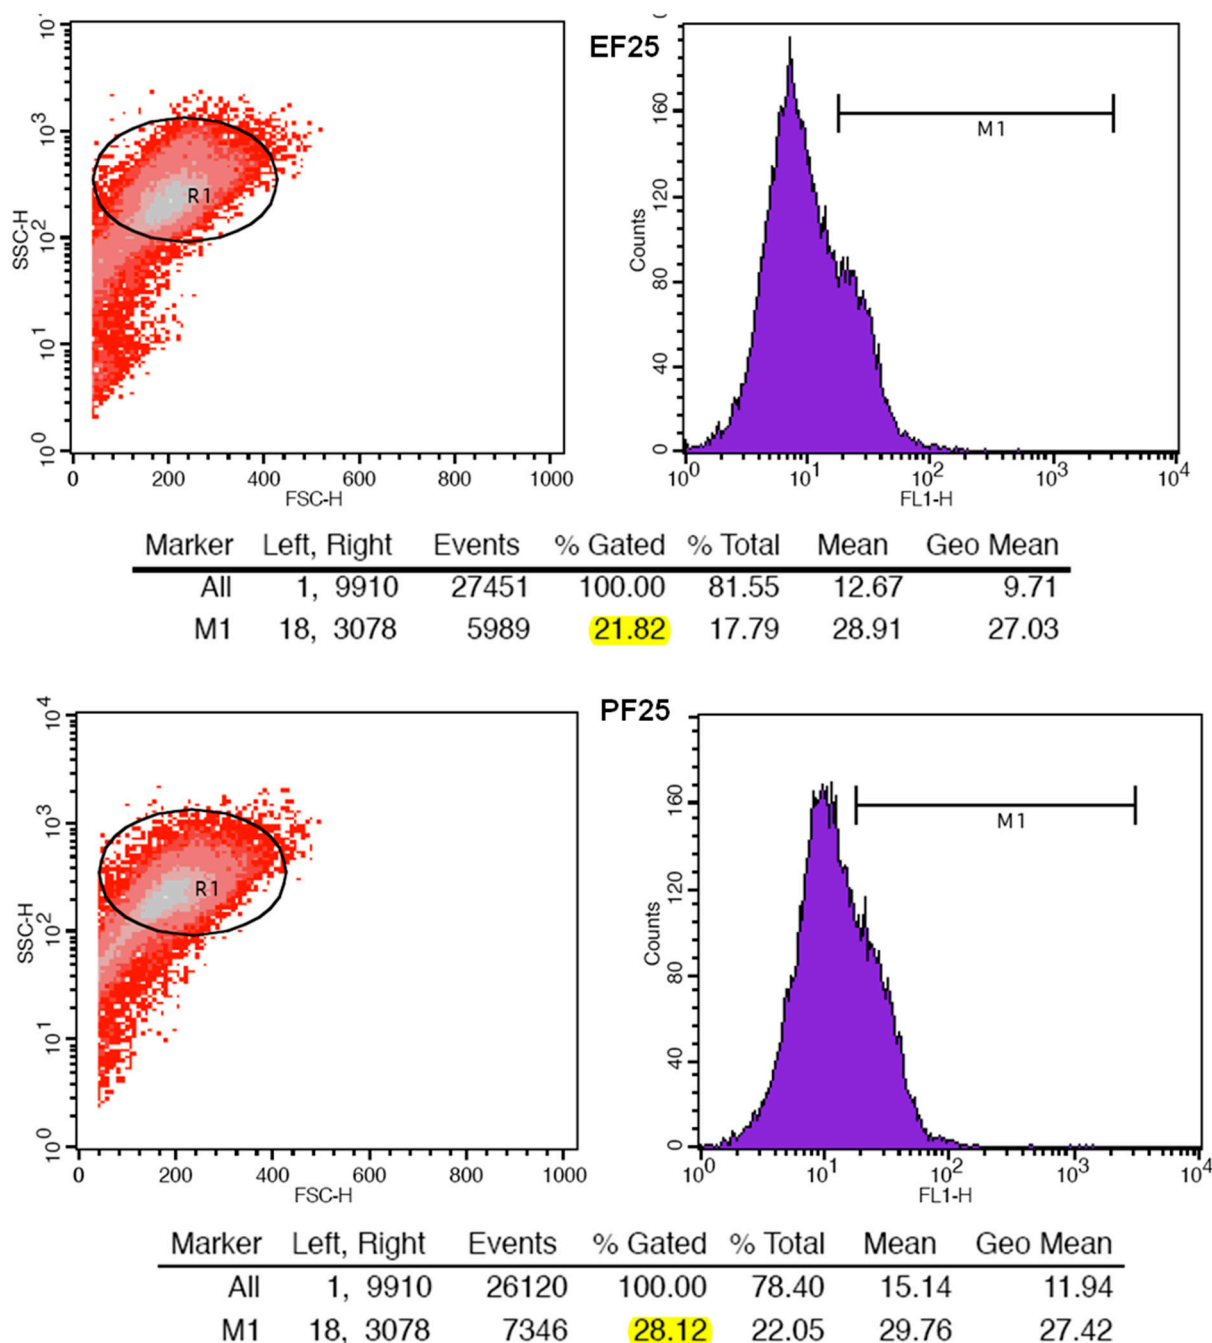

**Figure S1.** Representative graphics of flow cytometry analysis of N1E-115 cells transfected with NTS-polyplex NPs in EF25 or in PF25.

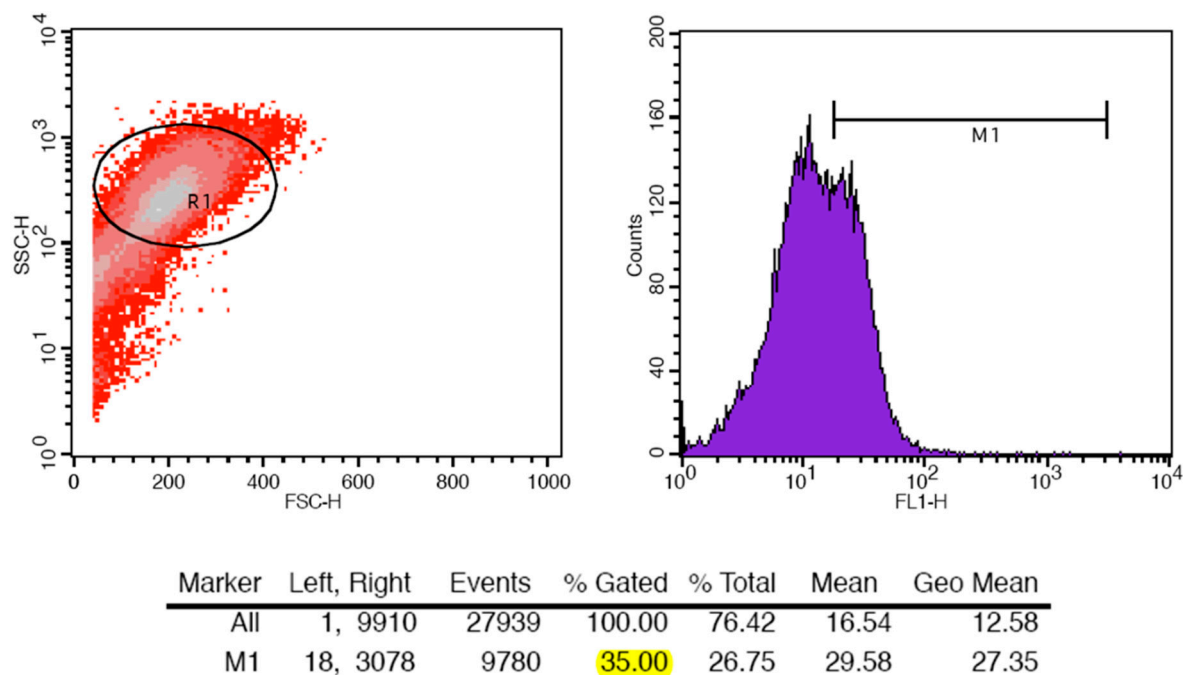

**Figure S2.** Representative graphics of flow cytometry analysis of N1E-115 cells transfected with NTS-polyplex NPs formulated in PF25, lyophilized and reconstituted with water for injection.

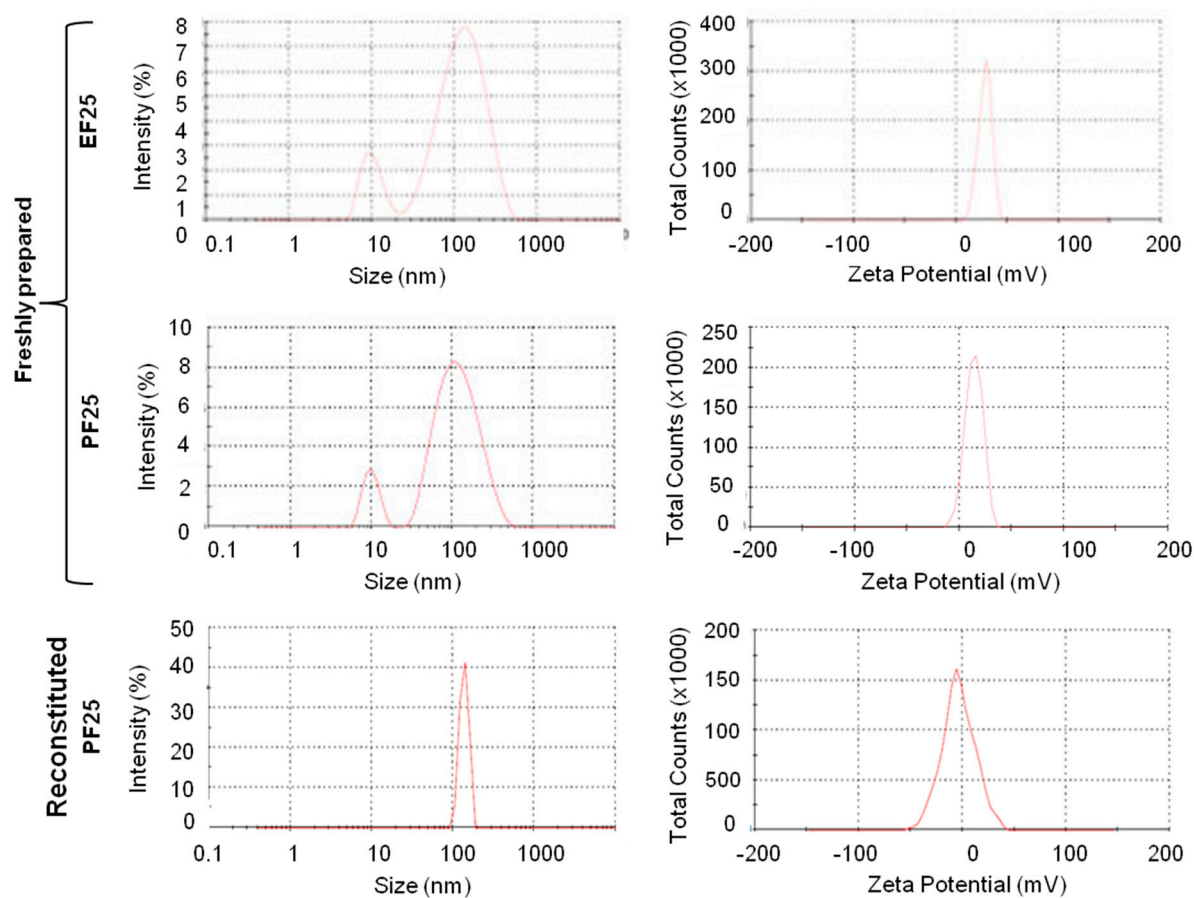

**Figure S3.** Representative graphics of size distribution and zeta potential of freshly prepared NTS-polyplex NPs in PF25 or in EF25 and NPs formulated in PF25, lyophilized and reconstituted with water for injection.

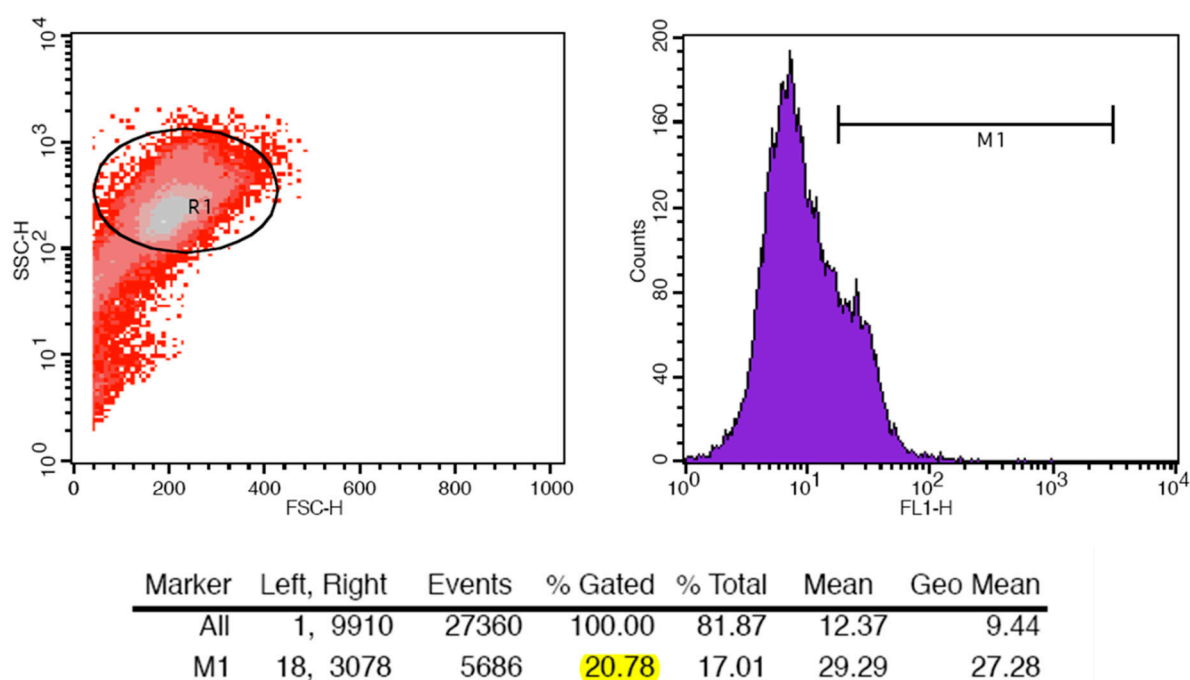

**Figure S4.** Representative graphics of flow cytometry analysis of N1E-115 cells transfected with NTS-polyplex NPs formulated in PF25, lyophilized and reconstituted with water for injection after their storage for 6 months at 25 °C and 60% Relative Humidity.
